# Supplementary material for: Transcriptional Network of p63 in Human Keratinocytes
Source: PLoS One. 2009 Mar 25;4(3):e5008. doi: 10.1371/journal.pone.0005008 (PMC2672041; doi:10.1371/journal.pone.0005008)
Supplement: Table S4 — List of primers used in ChIP and RT-PCR experiments. (0.03 MB XLS) [file pone.0005008.s007.xls]

## Sheet: ChIP primers
ACTL6A	actl6aprom_left	ggctgccttcgattggctaaa
	actl6aprom_right	AGGAGCGATAGCCCCTGACTC
AFF3	aff3intron1 downstream_l	ggggcttagaaaatttaaacagtttgc
	aff3intron1 downstream_r	ttgtcctgtgtagctggtactttgtg
	aff3intron1 upstream_left	ctgtccacctgccctcttcct
	affr3intron1 upstream_right	cggggagagtggagggttcta
CEBP/B	promoter -3.1kB	CAAGAGCCTTGTAAAAACAAGGG
		TGTTACTCGGACCTTGCAGG
	promoter -2,2kB	ACTCACCATTCATCGAGCACC
		AAACCCTCCCTGACCTTCCC
	promoter -1.5kB	TGCCCGCTGGGGCCAGGG
		ACTTGCCCGCCTCTGCTGGG
	promoter -1.0kB	CTGGCAATAGGTCTTAGGGC
		CTGCACATCAGAGAGAACGGG
CHRAC1	chrac1upbispr_left	tgccaaaatgtgctccctgt
	chrac1upbispr_right	gccaggatcatgggaagtgg
CITED2	promcited2_left	AGATTCGGAGCCGTTCCCTTT
	promcited2_right	cagggtgttcgcggtgttc
	upcited2_left	tttgcgtttgcagctcttggt
	upcited2_right	aatcaaccccaaaccgtcagg
CLOCK	clockuppr1_left	tcggttgcaaactacggttcc
	clockupprom1_right	cgtgtggaaagatggctccag
	clockin1_left	cccccaagctttgaaaaccaa
	clockin1_right	tgcaatattcccctctacctgtttg
DNM2	dnm2prom_left	gtccccagggggaaggtttac
	dnm2prom_right	ATCCGGTTCTCAGGCGACAC
ERCC1	ercc1in2_left	ccccgcatctccttgtcctac
	ercc1in2_right	CACCTTCCCTTTCAGGCTCCA
ERCC8	ercc8in9_left	tgaaagcacctggaacacaaagg
	ercc8in9_right	gtcaccccacccccatatcat
HOXC4	intrfaruphoxc4_left	cgggaaggtttcctccctctt
	intrfaruphoxc4_right	tttgggttgtgtggggttgtc
	prominhoxc4_left	aggggaaggcgagacttctga
	prominhixc4_right	gcccctcttccccatacacac
	intr1,2hoxc4_left	actgggttgctccgtgtgatt
	intr1,2hoxc4_right	CATGGAGGAAATTTCGGATCG
	hybhoxc4_left	ctaatcacggcggcgatcata
	hybhoxc4_right	tgcctcgtcgctacagctttt
ID2	id2-2500_for	ctagctggggccgtttgaact
	id2-2500_rev	aaattgctttcgtgggggaaa
	id2-800_for	gccctgcctccttcttgaaaa
	id2-800_rev	cgcgggaggcattactgtaaac
	id2tss_for	cgcccgctcgtcttgataga
	id2tss_rev	GCTGAGCTAGCTGCGCTTGG
	id2+900in1_for	tggaacttgctggtctgtgga
	id2+900in1_rev	TTCAGCCACACAGTGCTTTGC
	id2+1700in2_for	tgcccaatctttgagtgtttggt
	id2+1700in2_rev	gcgaaagagtgggggagaaag
IRF3	irf3bispr_left	AACAGACCCAAAAGCCGATGG
	irf3bispr_right	ATAACCGGCCCAGCGTAGAAA
IRF1	irf1prom_left	CGCACGTCTTGCCTCGACTAA
	irf1prom_right	tggggaatcccgctaagtgtt
LEF1	leffupbis_left	gcctatgctccaggtttcctga
	leffupbis_right	ttttcaatggacggggtctca
MTA2	mta2in3_left	ctctccaccctgcttccaacc
	mta2in3_right	cctgcaggtatttcccctggt
	mta2in1_left	ggtccctaccccaacctctcc
	mta2in1_right	AGCCTCCCGGACCCCTTT
NFATC4	nfatc4upstream prom_L	cacctcccttgccctcttagg
	nfatc4upstream prom_R	aagcggcctggtttgattttc
NFATC4	nfatc4intr1_L	GCGAGGATGAGGAGCTGGAAT
	nfatc4intr1_R	tcgacctctgactccctcacc
POLR3G	pol3gprom_left	agttggtagggctcACTCCGC
	pol3gprom_right	CTAAGTCTCGAAGCGTGGGCA
PPARB/D	promoter -2.5kB	ACGGTCTCCCTCTCATGCGG
		GGATCACTCGCGGTTAGGGG
	promoter -0.6kB	TAGGTGAATAAGCGTATTGCATA
		CTTCCAGTGAAGAAACTTAGTCC
PWP1	pwp1prom_left	caggcatcgtcacatgcagtc
	pwp1prom_right	gggacaaaatggaagcggaag
REXO4	xpmc2hprom_left	GAAGCGCtcgtctctccacaa
	xpmc2prom_right	ttcgcatctctcatccccatc
RUNX1	runx1ex1_left	GCAGCAGCGAGACGATACTCC
	runx1ex1_right	CGCCCGATCTGTTTCGATCT
SALL4	sall4intron1_L	cgcactgcttgggaaaacaac
	sall4intron1_R	tgtgggggtgaatggagagtg
	sall4pr_L	CCGCAGTTATTTGCCCTCTCC
	sall4pr_R	cctcacccctccctgatcaat
	sall4uppr_left	tctgggcatgcgtctttgttt
	sall4uppr_right	acaagctgggaacgtgatgaa
SATB2	satb2prom_left	TCCGGATCAATGTCCAGGAAC
	satb2prom_right	GCTCCAACCATTCGCATCATC
	satb2intron2_left	gctttccagccaaatgcaaaa
	satb2intron2_right	gtgatttgcaggggtttgtcg
SHOX2	shox2uppr_left	accccgctaaaagggaccagt
	shox2uppr_right	gggagaagggtgggagttctg
SMAD7	smad7farup_L	gggcagagaagctcccagaat
	smad7farup_R	cgccagggcctttaaaacaaa
	smad7intr1_L	tgtcttagctgtgggggttgg
	smad7intr1_R	ccgccctgtgaactgtgaagt
	smad7pr_left	cagcctcggcttcctacatgg
	smad7pr_right	cttctccccacccccaaatta
SUPT3H	supt3hin1_left	ctcccggctctctgacgtctc
	supt3hin1_right	CTCCACCCCCACATTCTCCTC
	supt3hintron2_left	aaatggggtgagggagtggaa
	supt3hintron2_right	ttggaacatggagctaaagttgacc
TBX5	tbx5pr_left	CCCGGATTCGAGGTAAGAGTCA
	tbx5pr_right	cgacagagtgcagtgggagcta
TGFB1I1	tgfb1i1pr2_left	ACTGGGCCAATGGAGCAATTT
	tgfb1i1pr2_right	CAAGCACAAACCCAGCCTCCT
TLE6	tle6pr_L	ctgcgccttcattgatctgct
	tle6pr_R	agaacacgcctggcaactcac
	tle6uppr_left	tcacaggtgtgagccatggtg
	tle6uppr_right	cctgggatgatttccgagagg
TRPS1	trps1hyb_left	caggatgtgtgtgtgcgtgtg
	trps1hyb_lright	ccgcacttctccaactcagga
TWIST1	twist1pr_left	GCGAGAGCTGCAGACTTGGAG
	twist1pr_right	ttgaatggtttgggaggacga
ZNF256	znf256pr_left	gaggcctcattggctgaaggt
	znf256pr_right	ccccaacctggagtgtccatt
SATcen11	SATC_CEN11_L	GGCGACCAATAGCCAAAAAGTGAG
	SATC_CEN11_R	CAATTATCCCTTCGGGGAATCGG
NFYC	NF-YC P2_for	CCCTGTTCTGCTTCTCAAGG
	NF-YC P2_rev	CTGCAGCCTCCTTCCACTTT
	NF-YC P1Up_for	CACACACACGCCCCTACTTA
	NF-YC P1Up_rev	GGCGGAATGAGATCTGAGAG
	NF-YC P1Dw_for	GACCTGGCACCTTATTGGAC
	NF-YC P1Dw_rev	CCTCTCTTCCCCCTTAAAGC

## Sheet: RT primers
IVL (invpolucrin)	rtinvl_for	ctctgcctcagccttactgtga
	rtinvl_rev	gacctccactgggagctcgac
PPARB/D	rtppard_for	GGCCATCATTCTGTGTGGAGAC
	rtppard_rev	CAGGATGGTGTCCTGGATAGC
hSATB2	rtsatb2_for	CCCCCTCAGTTATGTGACAGATGCACCC
	rtsatb2_rev	TTGCGGACTGTGGCATGGTTCCAC
SMAD7	rtsmad7_left	tccagatgctgtgccttcctc
	rtsmad7_right	gcctccccactctcgtcttct
MTA2	rtmta2_for	CGGCGCAGGGACATTTCTAGT
	rtmta2_rev	GACACCCCTGGCTGCTTTGAT
TGFB1I1	rttgf_for	CAGCCCATCCGACACAAGATG
	rttgf_rev	CGCAACTGACGCAGCAGAAAT
POLR3G	rtplor3g_left	cccaaaacccaaaaaggcaaa
	rtpolr3g_right	cctcatctgatttttcaccatcacc
IRF1	rtirf1_for	CCAGGCAACCTCTGCCTTCTT
	rtirf1_rev	GTGATGGGCATGTTGGCTCTG
IRF3	rtirf3_for	GGTCCCCAAGGACAAGGAAGG
	rtirf3_ev	TGACTCCCCCACACAGAACCA
SUPT3H	rtsuprh_for	CCCAATGTTGTCGCAATGGAA
	rtsup3h_rev	GGGGTCCCCTGCCTTGGTTAC
PWP1	rtpwp1_for	GCAGAAGGGCATACCGATGCT
	rtpwp1_rev	TGCTGGTTTCCCCAAGGACAT
CLOCK	rtclock_for	TTTGATGGGTTGGTGGAAGAAGA
	rtclock_rev	CCAGGAAGCATGGATCCCAGT
LEF1	rtlef1_for	TCCAGGCTGGTCTGCAAGAGA
	rtlef1_rev	GGCAGCTGTCATTCTTGGACCT
NFATC4	rtnfatc4_for	CTCCGGAGCAGGAGAAATCCA
	rtnfatc4_rev	GTGCAGGGAAGCCACTCAGGT
ID2	RTid2_for	tgaccaccctcaacacggata
	RTid2_rev	caccgcttattcagccacaca
NR4A2	rtnr4a2_for	CCAGGTTCCAGGCGAACCCTGAC
	rtnr4a2_rev	GCCCAGCCCCGGATGATCTCCAT
JMJD2D	rtjmjd2d_for	AACAAACCTAGAGAGTTGGGCTTCG
	rtjmjd2d_rev	GGTTCCTGCTTTCCTGGAACTTATG
CHRAC1	rtchrac1_for	CAAACACTGCACAGCAATCAGAAAC
	rtchrac1_rev	CCTCATCTTCTTCCCTCTTTTCCTC
SNF8	rtsnf8_for	AGTATAAGGAGCGAGGGACGGTCTT
	rtsnf8_rev	ATTCCTCCAGGTTGGTCTTGAACAT
cited2	rtcited2_left	gccaggaaggtcccctctatg
	rtcited2_right	ggccatcatatggtctgccatt
ACTL6A	rtactl6a_left	caggttacgaggtcttggcaca
	rtactl6a_right	ctttagccgctctgcaccaaa
hoxc4	rthoxc4_left	ccagcaagcaacccatagtc
	rthoxc4_right	ctcagagaggcacagcgagt
REXO4	rtxpmc2_left	gggcacgctctgcataatgac
	rtxpmc2_right	cctgggcatcctgaattgaac
DNM2	rtdnm2_left	tgactcccaggaagacgtgga
	rtdnm2_right	gtcgcggatggacttgttgat
DNp63	huDNp63Fwd_RT	GAAGAAAGGACAGCAGCATTGAT
	huDNp63Rev_RT	GGGACTGGTGGACGAGGAG
SALL4	rtsall4_left	gatccacgagcggactcacac
	rtsall4_right	ctcgatggccaacttccttcc
ZNF256	rtznf256_left	gggcattgtgacctttgagga
	rtznf256_right	ctcatcccctgctccagaacc
FLG (filaggrin)	rtfilag_for	gaacaaggttcacatttattgccaaa
	rtfilag_rev	tccaagtgatccatgaagacatcaa
KRT5 (ck5)	rtck5_for	cggatgatccagaggctgaga
	rtck5_rev	gctcctggtactcacgcagca
GAPDH	rtgapdh_for	GCCTCAAGATCATCAGCAATGC
	rtgapdh_rev	CCACGATACCAAAGTTGTCATGG
NFYC	hNFYC_EX7_for	AGTGGCACTGGACAGACCAT
	hNFYC_EX8_rev	CCTGATACAGGCTGGGCTAA
